# Supplementary material for: The precursor-compensation strategy boosts the photoresponse performance of air-stable, self-powered Cs2SnI6 photodetectors
Source: Royal Society of Chemistry journal article supplement (doi:10.1039/d1tc03834f), 2021-01-01
Supplement: d1tc03834f1.pdf [file d1tc03834f1.pdf]

## Electronic Supporting Information

### **Precursor-Compensation Strategy Boosts Photoresponse Performance of Air-stable, Self-powered Cs<sub>2</sub>SnI<sub>6</sub> Photodetectors**

Junyi Huang, Chen Dong\*, Yantao Mei, Xiayao Lu, Gentian Yue, Yueyue Gao, Rong  
Liu, Weifeng Zhang, Furui Tan\*

Key Laboratory of Photovoltaic Materials, Henan University, Kaifeng, 475004, PR  
China.

#### **Corresponding authors.**

E-mail address: \*Chen Dong, [phydongchen@163.com](mailto:phydongchen@163.com); \*Furui Tan, [frtan@henu.edu.cn](mailto:frtan@henu.edu.cn)

Typically,  $\text{Cs}_2\text{SnI}_6$  films are prepared by using a stoichiometric  $\text{SnI}_4$ :  $\text{CsI}$  ratio (1:2) in the precursor solution. However, due to the easy volatilization of  $\text{SnI}_4$ ,  $\text{CsI}$  precursor will be excessive in the film-forming process, especially for the films fabricated with stoichiometric precursor. **Fig. S1** shows the XRD patterns of the  $\text{Cs}_2\text{SnI}_6$  films (without  $\text{SnI}_4$  precursor compensation) prepared with  $\text{SnI}_4$ :  $\text{CsI}$  stoichiometric (1:2) and non-stoichiometric (1:1) ratios. Obviously, stronger  $\text{CsI}$  impurity peaks are observed for the  $\text{Cs}_2\text{SnI}_6$  film obtained with the  $\text{SnI}_4$ :  $\text{CsI}$  ratio of 1:2 than that with ratio of 1:1, suggesting the non-stoichiometric precursor engineering will make it easier to obtain a pure-phase ( $\text{CsI}$  impurity free)  $\text{Cs}_2\text{SnI}_6$  double perovskite through the developed PCT strategy.

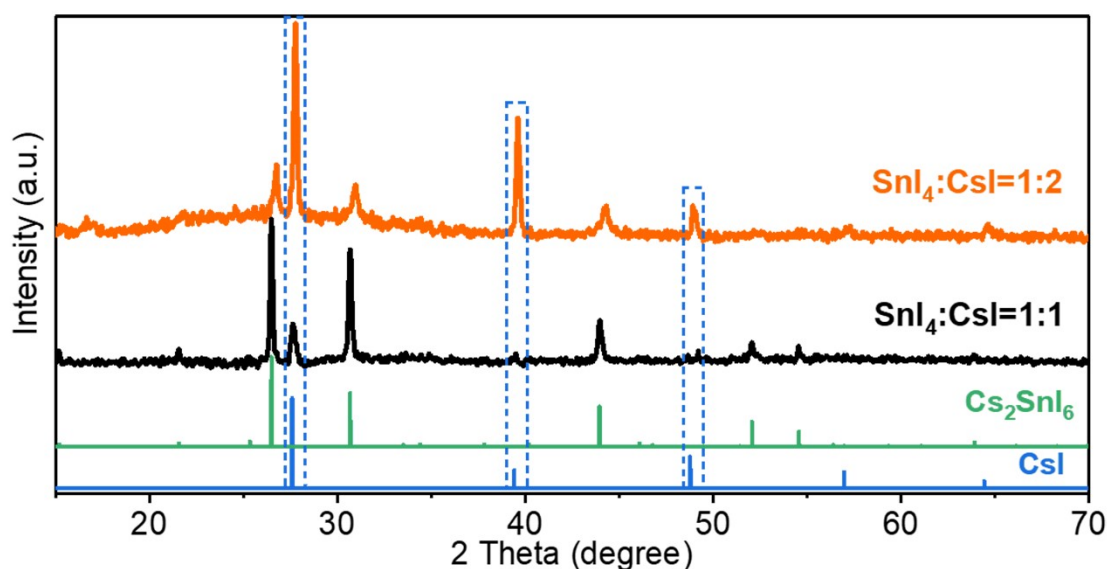

**Fig. S1** XRD patterns of the  $\text{Cs}_2\text{SnI}_6$  films prepared with different  $\text{SnI}_4$ :  $\text{CsI}$  stoichiometric ratios.

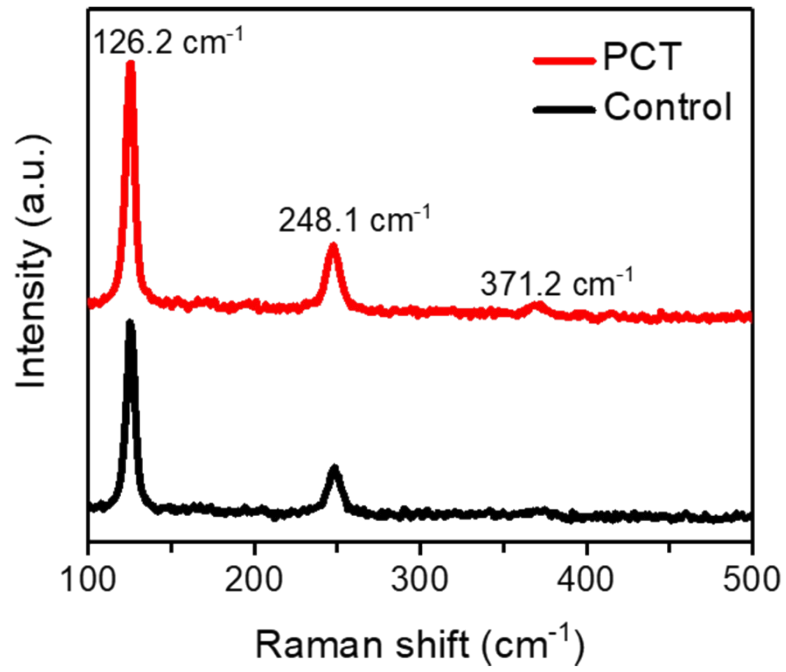

**Fig. S2** Raman spectra of the PCT-Cs<sub>2</sub>SnI<sub>6</sub> film and control sample.

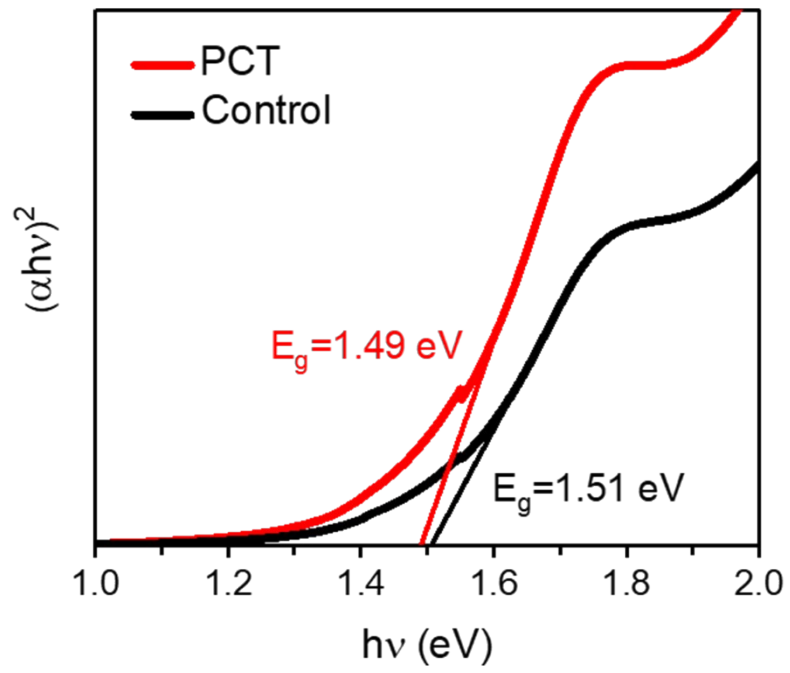

**Fig. S3** Tauc plot of the PCT- $\text{Cs}_2\text{SnI}_6$  film and control sample.
